# Supplementary material
Source: Elsevier journal article supplement (http://www.tavernarakislab.gr/publications/mmc1.pdf)
Supplement: mmc1 [file mmc1.pdf]

iScience, Volume 26

## **Supplemental information**

**A proton-inhibited DEG/ENaC ion channel  
maintains neuronal ionstasis and promotes  
neuronal survival under stress**

**Dionysia Petratou, Martha Gjicolaj, Eva Kaulich, William Schafer, and Nektarios Tavernarakis**

Supplemental Figures

Figure S1

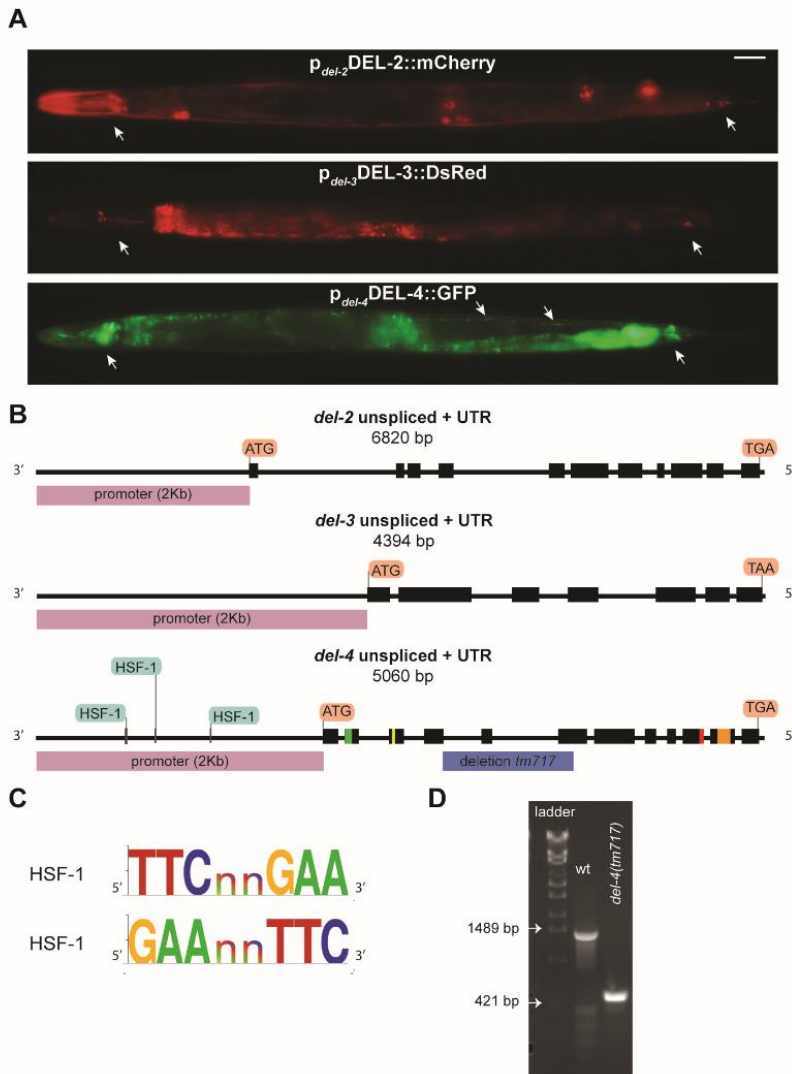

# Figure S2

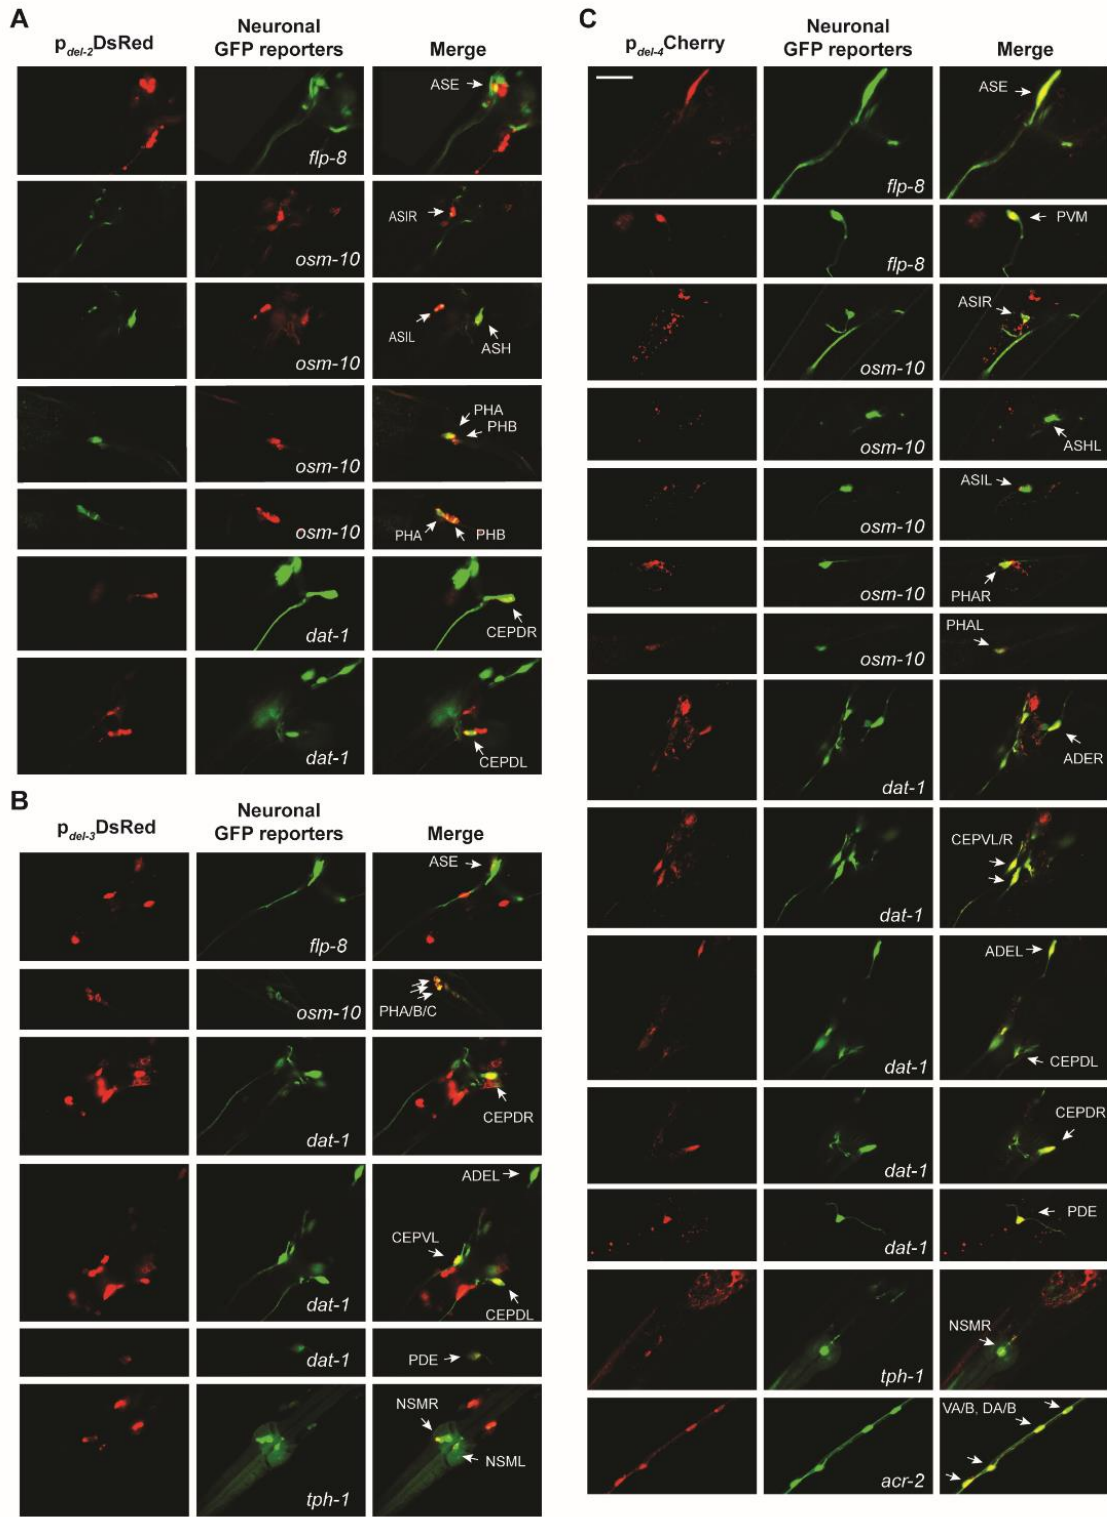

# Figure S3

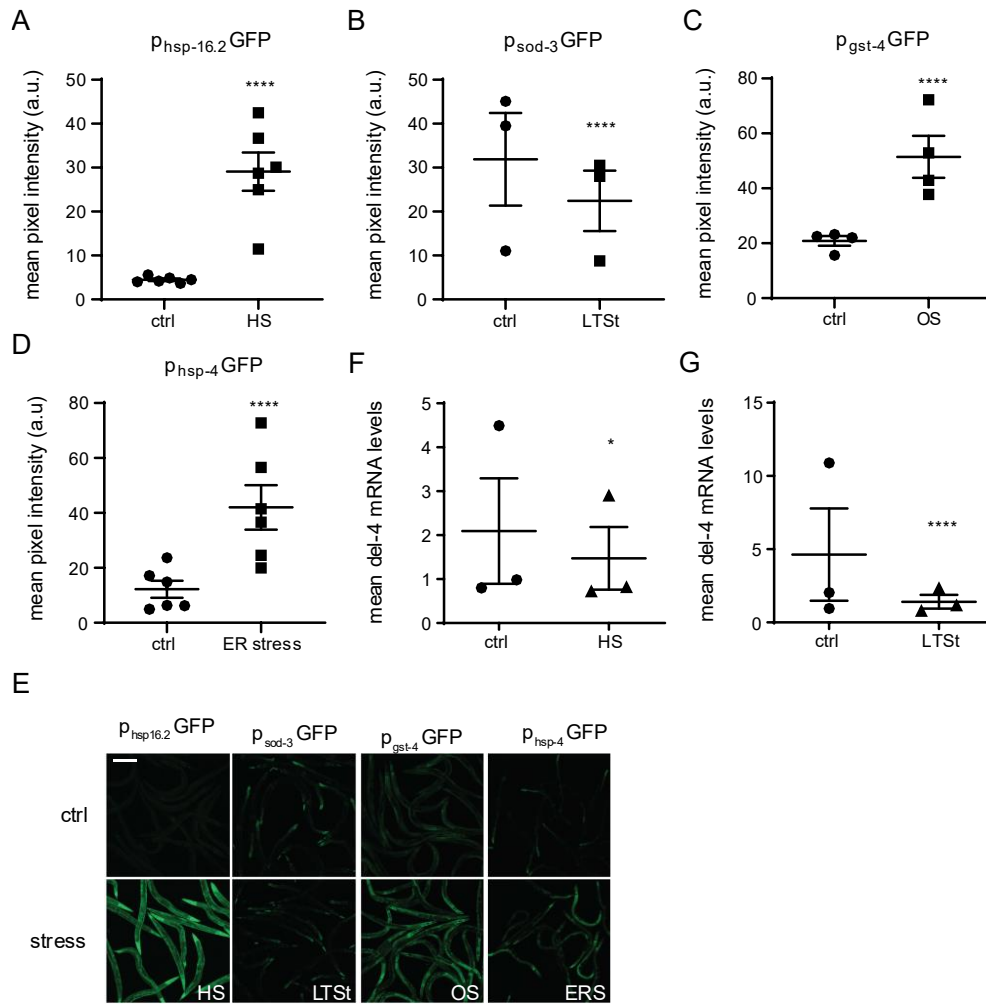

# Figure S4

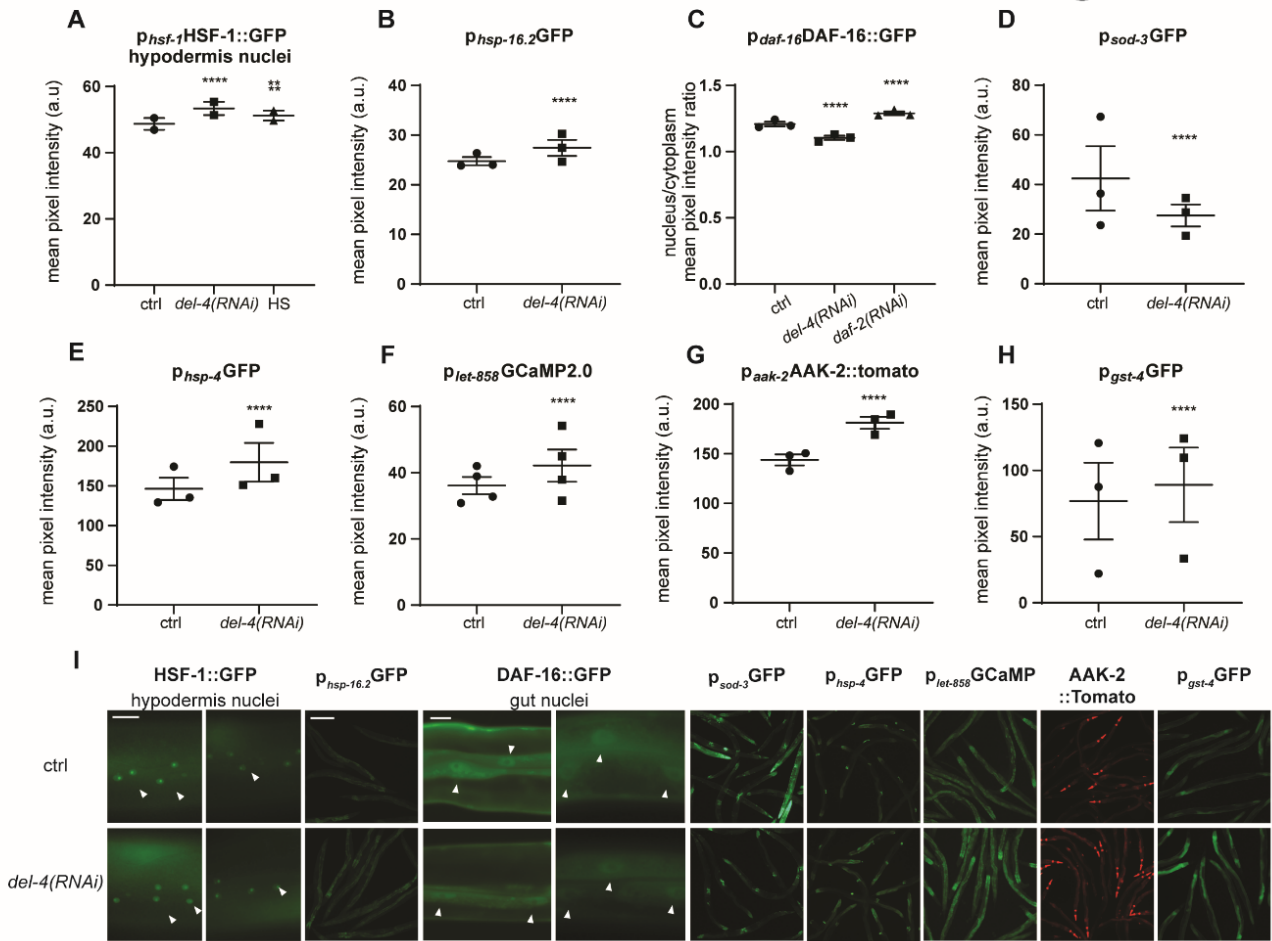

# Figure S5

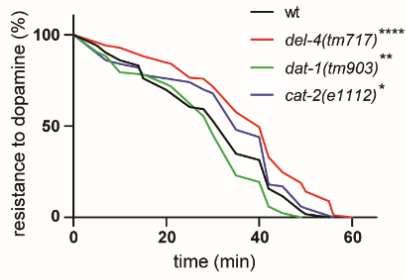

# Figure S6

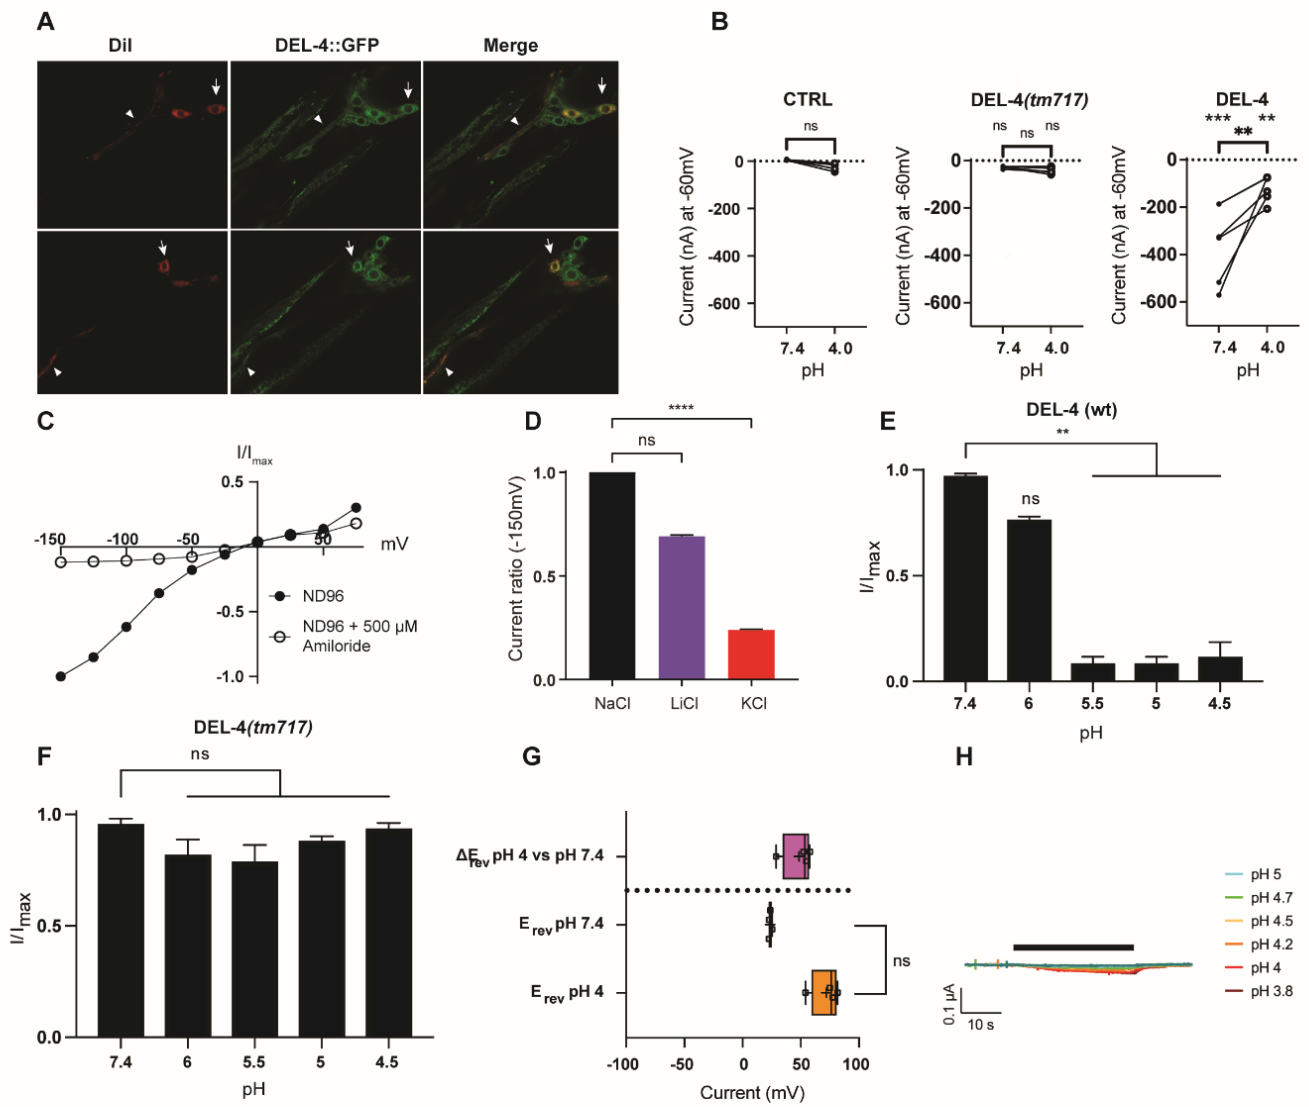

## Supplemental Figure Legends

### Figure S1. Expression pattern and gene structure of *del-2*, *del-3* and *del-4*, Related to Figures 1 and 2.

(A) All three DELs are expressed in neuronal cells of the head and tail of *C. elegans*. In addition, DEL-4 localizes to a series of neurons along the *C. elegans* body. Epifluorescence images of lines expressing the *del-2*, *del-3* and *del-4* translational reporters. Arrows indicate sites of expression. Lens 20x. We captured images from the head, midbody, and tail regions and aligned them using Adobe Photoshop CS5 to illustrate the entire animal. Left is anterior. Scale bar 50  $\mu\text{m}$ .

(B) Genetic loci of *del-2*, *del-3* and *del-4* genes. Black boxes, starting from ATG until the stop codon, indicate the exons. Upstream of ATG is designated the 2 kb of the promoter region (pink box) and binding sites of HSF-1 transcription factor in the *del-4* promoter (cyan boxes). Site of deletion identified in the *del-4(tm717)* mutant is indicated with blue box below the *del-4* open reading frame. The deletion site in the *del-4* gene induce the development of premature stop codon immediately after the missing sequence. Representation of coding regions that correspond to protein domains is shown in green, yellow, red, and orange, respectively. The green region represents the first transmembrane domain, the yellow box denotes the post-M1 domain, the red region corresponds to the pre-M2 domain and the orange box denotes the second transmembrane domain. The region between the two transmembrane domains corresponds to the extracellular domain. We retrieved the DNA sequences and exon/intron annotations from WormBase (<https://wormbase.org/>). We utilized the bioinformatics tool Phobius (<https://phobius.sbc.su.se/>) (see KRT) to estimate the transmembrane domains. Annotation of the *del-2* sequence corresponded to that of isoform 1. Transcription factor binding sites in the promoter region of *del-4* correspond only to the forward direction. We employed the software product SnapGene (KRT) for editing and annotating the DNA sequences.

(C) DNA sequences previously identified as HSF-1 binding sites (1). To generate DNA sequence logos, we used the WEBLOGO application (<https://weblogo.berkeley.edu/>) (2). Letter n represents any nucleotide.

(D) Agarose gel electrophoresis image of PCR products for the *del-4* gene, using as template genomic DNA isolated from wt and *del-4(tm717)* mutant animals. We used 1% w/v agarose gel

stained with ethidium bromide. We used primers flanking the DNA region *del-4* mutations to amplify the genomic DNA. Predicted band sizes: wt 1404 bp, *del-4(tm717)* 498 bp. We generated the ladder by digesting  $\lambda$  phage DNA with Styl.

**Figure S2. Neuronal expression of DEL-2, DEL-3 and DEL-4, Related to Figure 1.**

(A) Expression pattern of DEL-2 in chemosensory and dopaminergic neurons (ASE, ASH, ASI, PHA, PHB, and CEPDL/R) (Tables S2 and S3).

(B) DEL-3 expression in chemosensory, dopaminergic, and serotonergic neurons (ASE, PHA, PHB, PHC, CEPDL/R, CEPVL, ADEL, PDE, and NSMR/L) (Tables S2 and S3).

(C) Localization of DEL-4 in amphid, phasmid, dopaminergic, serotonergic, mechanosensory and cholinergic motor neurons (ASE, ASI, ASH and PHA, PVM, CEPDL/R, CEPVL/R, ADEL/R, PDE, NSMR, VA/B, DA/B) (Tables S2 and S3).

(A-C) Confocal images (Z-stacks) of strains co-expressing mCherry or DsRed under the *del-2*, *del-3* or *del-4* promoters (left in each panel seen in red) and GFP driven by *flp-8*, *osm-10*, *dat-1*, *tph-1* or *acr-2* promoters (middle seen with green). Promoters of *flp-8* and *osm-10* drive expression in the sensory neurons, ASE, URX, PVM and ASH, ASI, PHA, PHB, respectively. The promoter of *dat-1* drives the expression of GFP in the dopaminergic neurons (CEPD, CEPV, ADE, PDE), the *tph-1* promoter in the serotonergic neurons (NSM, ADF) and the *acr-2* promoter in the cholinergic motor neurons (VA/B, DA/B). (right) The right column of each panel corresponds to merged images. We utilized merged images of z-stacks to assess colocalization. One day adult animals. Arrows indicate neuronal cell somas where mCherry or DsRed is co-expressed with GFP. Lens 40x. Left is anterior. Scale bar 20  $\mu$ M.

**Figure S3. Control experiments for stress-induction assays, Related to Figure 2.**

(A) Heat stress for 2.5 hrs at 37 °C and O/N recovery induces the expression of the heat shock chaperone HSP-16.2. We measured the fluorescence intensity from the whole body of animals expressing the transcriptional reporter *p<sub>hsp-16.2</sub>GFP* upon control temperature (20 °C) and HS.

(B) Long-term starvation for 24 hrs reduces SOD-3 expression levels. The mean fluorescence intensity was measured from the whole body of well-fed and starved animals expressing the *p<sub>sod-3</sub>GFP* transcriptional reporter.



(A, B) We applied stress on day one of adulthood and imaged the animals on day two.

(C) Induction of GST-4 expression after treatment for 24 hrs with paraquat plated on OP50-seeded NGM plates to a final concentration of 8 mM. We measured the expression levels of GST-4 from the whole body of animals expressing the  $p_{gst-4}$ -GFP transcriptional reporter, upon control conditions and oxidative stress.

(D) HSP-4 expression levels increase after 24 hrs of treatment with 5  $\mu$ g/ml tunicamycin plated on OP50-seeded NGM plates. We used animals expressing the transcriptional reporter  $p_{hsp-4}$ -GFP and measured mean fluorescence intensity from the entire animal.

(C, D) We placed animals at the L4 stage on paraquat or tunicamycin and imaged them on day one of adulthood.

(F, G) Reduced *del-4* mRNA levels upon HS and LTSt. We measured with RT-PCR the mean *del-4* mRNA levels, using as template cDNA from 2-day adult wt animals upon control conditions, HS and LTSt. We isolated total mRNA from wt animals (control and stressed, reversely transcribed it into complementary DNA (cDNA) and used it as template for RT-PCR. Dot plot, dots represent the mean *del-4* mRNA levels from independent biological replicates. We performed 3 independent biological replicates and for each biological we performed three technical replicates.

(E) Representative images of indicated reporters upon control and stress conditions. 5x lens. Scale bar 200  $\mu$ m.

(A-D) Dot plots, dots represent the mean fluorescence of independent biological replicates. n represents the number of animals.

(F-G) Dot plots, dots represent the mean mRNA levels of independent biological replicates.

(A-D, F,G) Error bars represent SEM. ns  $p=0.1234$ , \* $p=0.0332$ , \*\* $p=0.0021$ , \*\*\* $p=0.0002$ , \*\*\*\* $p<0.0001$ . Two-way ANOVA analysis.

(A) ctrl n=141, HS n=119, (B) ctrl n=110, LTSt n=80, (C) ctrl n=103, OS n=80, (D) ctrl n=57, ERS n=62.

**Figure S4. DEL-4 deficiency interferes with activation of distinct stress responses**

**Related to Figure 3.**

(A) HSF-1 expression levels in hypodermis nuclei increased upon *del-4(RNAi)*. We measured the mean fluorescence intensity of hypodermis nuclei of animals expressing the  $p_{hsf-1}$ -HSF-1::GFP construct. We overlooked the nuclei located above the gut to avoid intestinal autofluorescence. The expression levels of HSF-1 upon HS treatment served as the positive control.

(B) Depletion of *del-4* with RNAi increases the expression levels of the HSF-1 target HSP-16.2. We used the  $p_{hsp-16.2}$ GFP transcriptional reporter expressing animals and measured the whole body upon control and *del-4(RNAi)* conditions.

(C) The DAF-16 ratio of the nucleus to the cytoplasm decreased upon *del-4(RNAi)*. *daf-2* RNAi was used as a positive control. We measured the intensity levels of DAF-16 in the nuclei and adjacent cytoplasm of the gut, using a strain expressing the  $p_{daf-16}$ DAF-16::GFP translational reporter.

(D) Elimination of *del-4* with RNAi lowers the expression levels of the DAF-16 target SOD-3. We measured the fluorescence intensity from the whole body of 4-day adult animals expressing the  $p_{sod-3}$ GFP transcriptional reporter upon control and *del-4* RNAi conditions.

(E) Depletion of *del-4* with RNAi increases the expression levels of HSP-4, an ER stress marker. We used animals expressing the transcriptional reporter  $p_{hsp-4}$ GFP and measured fluorescence intensity from the whole body upon control and *del-4(RNAi)* conditions.

(F) Cytoplasmic  $Ca^{2+}$  levels rise upon *del-4(RNAi)*. Measurement of intracellular  $Ca^{2+}$  levels using animals expressing the genetically encoded calcium indicator GCaMP2.0 driven by the *let-858* promoter for systemic expression. Measurements were obtained from the whole body.

(G) Increased AAK-2 expression levels were observed upon *del-4(RNAi)*. We measured mean fluorescence intensity from the whole body of animals expressing the translational reporter  $p_{aak-2}$ AAK-2::Tomato.

(H) The expression level of the SKN-1 target GST-4 increase upon treatment with *del-4(RNAi)*. The expression levels of animals expressing the transcriptional reporter  $p_{gst-4}$ GFP were measured from the whole body.

(I) Representative images of the designated reporters. Scale bars, 20  $\mu\text{m}$  apart from the images corresponding to  $P_{hsf-1}\text{HSF-1}::\text{GFP}$  (hypodermis nuclei) and  $\text{DAF-16}::\text{GFP}$  (gut nuclei), where the scale bar corresponds to 200  $\mu\text{m}$ .  $P_{hsf-1}\text{HSF-1}::\text{GFP}$  (hypodermis nuclei): 40x lens,  $\text{DAF-16}::\text{GFP}$  (gut nuclei): 20x, rest of the images: 5x lens. Left is anterior

(A-D, F, H) Four-day adult animals. (E, G) 3-day adult animals.

(A-H) Dot plots, dots represent the mean fluorescence intensity of independent biological replicates. Error bars represent SEM. ns  $p=0.1234$ ,  $*p=0.0332$ ,  $**p=0.0021$ ,  $***p=0.0002$ ,  $****p<0.0001$ . Two-way ANOVA analysis. (A) ctrl  $n=257$ ,  $del-4(\text{RNAi})$   $n=291$ , HS  $n=392$ ,  $n$  = the number of hypodermis nuclei measured. (B) ctrl  $n=245$ ,  $del-4(\text{RNAi})$   $n=177$ . (C) ctrl  $n=519$ ,  $del-4(\text{RNAi})$   $n=733$ ,  $daf-2(\text{RNAi})$   $n=642$ ,  $n$  = the number of gut nuclei measured. (D) ctrl  $n=156$ ,  $del-4(\text{RNAi})$   $n=154$ . (E) ctrl  $n=128$ ,  $del-4(\text{RNAi})$   $n=154$ . (F) ctrl  $n=207$ ,  $del-4(\text{RNAi})$   $n=217$ , (G) ctrl  $n=142$ ,  $del-4(\text{RNAi})$   $n=127$ , (H) ctrl  $n=250$ ,  $del-4(\text{RNAi})$   $n=245$ .

**Figure S5. Animals lacking DEL-4 are resistant to exogenously applied dopamine, Related to Figure 5.**

DEL-4 amelioration results in increased resistance to dopamine. We measured the time to paralysis in a 20  $\mu\text{l}$  drop of 40 mM dopamine of ctrl,  $del-4(tm717)$ ,  $dat-1(tm903)$  and  $cat-2(e1112)$  animals (Tables 1 and S4).  $dat-1(tm903)$  and  $cat-2(e1112)$  animals were used as controls.  $dat-1$  encodes for the dopamine transporter; thus, in the absence of DAT-1 dopamine is retrieved from the synapse back to the pro-synaptic cell accumulating at the synaptic cleft. Therefore,  $dat-1$  mutants are expected to paralyze faster compared to wt. CAT-2 is involved in dopamine biosynthesis from tyrosine. Therefore, in the absence of CAT-2 reduced amount of dopamine would be released at the synaptic cleft and it would take more time for  $cat-2$  mutants to paralyze in dopamine compared to wt. We observed that  $del-4$  and  $cat-2$  mutant animals are resistant to dopamine, while  $dat-1(tm903)$  animals are sensitive. Experiments were performed with day-1 adult animals. Survival curve analysis was performed for estimation of significance. ns  $p=0.1234$ ,  $*p=0.0332$ ,  $**p=0.0021$ ,  $***p=0.0002$ ,  $****p<0.0001$ . Ctrl  $n=172$ ,  $del-4(tm717)$   $n=170$ ,  $dat-1(tm903)$   $n=170$ ,  $cat-2(31112)$   $n=100$ .  $n$  represents number of animals.

**Figure S6. Amiloride and low pH block the homomeric DEL-4 sodium channel, Related to Figures 6 and 7.**

(A) Membranous localization of DEL-4 on neuronal cells. Confocal images show the colocalization of GFP expression with the lipophilic dye Dil at the surface of neuronal cell bodies and processes, examined on animals expressing the  $p_{del-4}$ DEL-4::GFP translational reporter and stained with Dil. Left,  $p_{del-4}$ DEL-4::GFP expressing animals (green). Middle, Dil staining in Red. Right, merged images. We utilized merged images of z-stacks to assess colocalization.

Neuronal cell bodies (arrows) and dendrites (small arrowheads) are indicated. Left is anterior.

One day adult animals. Scale bar 20  $\mu$ M. Confocal images (Z-stacks) at 63x lens.

(B) DEL-4 currents at neutral pH are inhibited at pH 4. Currents of the nuclease-free water-injected controls and the truncated DEL-4(tm717) mutant currents are not blocked by acidic pH 4. Graphs show raw current upon perfusion with either pH 7.4 (filled circle) or pH 4 (open circle) as indicated, for *Xenopus* oocytes injected with the DEL-4 *wild-type* or *tm717* mutant, or water-injected controls. Lines connect data from individual oocytes. (n = (from left to right) 5, 5, 6)

Currents were recorded at a holding potential of -60mV.

(C) Amiloride inhibits the DEL-4 channel. Current-voltage (I-V) relationships for *Xenopus* oocytes injected with *del-4* cRNA, following perfusion of oocytes with a physiological NaCl solution (1X ND96) (black circles), and in the presence of 500  $\mu$ M of the DEG/ENaC channel blocker amiloride (open circles) (n = 10). Voltage steps were from -150 mV to +75 mV, from a holding potential of -60 mV.

(D) The DEL-4 channel is permeable to monovalent cations ( $\text{Na}^+$ ,  $\text{Li}^+$ ), as established by determining the ratio of the current at -150 mV when perfusing oocytes with NaCl, LiCl or KCl solutions (n = 10).

(E-F) Low pH in the range of 4.5-5.5 blocks the DEL-4 homomeric channel. Heterologously expressed DEL-4 channel, perfused with solutions of increasing pH starting from pH 4.5 to 7.5 (n = 5). Currents were recorded at a holding potential of -60mV, normalized to maximal currents ( $I/I_{\text{max}}$ ), Kruskal-Wallis test and post-hoc Dunnett's multiple comparisons test found no significant difference in current ratio for the DEL-4(*tm717*) mutant controls, but DEL-4 wild-type currents were significantly blocked at low pH (n = 5 each). Amount of total cRNA (500 ng/ $\mu$ l) injected for each construct. Error bars represent Mean and SEM.

(G) DEL-4 ins not permeable for protons. Summary of reversal potential  $E_{rev}$  of DEL-4 expressing oocytes and controls (DEL-4(tm717) mutant and water-injected oocytes) when perfused with basal pH 7.4 (cyan) and acidic pH 4 (orange) (top to bottom, n= 6, 8, 3). Low pH did not statistically significantly change the  $E_{rev}$  as assessed by a paired Wilcoxon test (top to bottom, p=0.094, ns; p=0.844, ns; p =0.750, ns). DEL-4(tm7171) and water-injected controls have significantly lower currents which might contribute to higher variability. Data are presented as boxplots with median (dash), mean (cross) and min and max error bars.  $E_{rev}$  were calculated as described in Star methods.

(H) Representative traces of water-injected *Xenopus* oocytes used as controls of DEL-4 expressing oocytes when perfused with ND96 solution at various proton concentrations from a neutral baseline (pH 7.4). Currents were recorded at a holding potential of -60mV, and traces were baseline-subtracted and drift-corrected using Roboocyte2+ (Multichannels) software.

## References

1. Trinklein ND, Murray JI, Hartman SJ, Botstein D, Myers RM. The role of heat shock transcription factor 1 in the genome-wide regulation of the mammalian heat shock response. *Mol Biol Cell*. 2004;15(3):1254-61.
2. Crooks GE, Hon G, Chandonia JM, Brenner SE. WebLogo: a sequence logo generator. *Genome Res*. 2004;14(6):1188-90.

## Supplemental Tables

**Table S1.** List of abbreviations used in the paper, Related to Star methods.

| Abbreviation      | Definition                                                                                |
|-------------------|-------------------------------------------------------------------------------------------|
| a.u.              | arbitrary units                                                                           |
| ACh               | Acetylcholine                                                                             |
| AD                | Alzheimer's Disease                                                                       |
| ALS               | Amyotrophic Lateral Sclerosis                                                             |
| AMP               | Adenosine MonoPhosphate                                                                   |
| AMPK              | AMP-activated protein Kinase                                                              |
| ANOVA             | one-way ANalysis Of Variance                                                              |
| AS                | Acidic Stress                                                                             |
| ASAP1             | Accelerated Sensor of Action Potentials1 (Genetic Voltage Indicator)                      |
| ASICs             | Acid Sensing sodium Channels                                                              |
| BLAST             | Basic Local Alignment Search Tool                                                         |
| BS                | Basal Slowing                                                                             |
| BSA               | Bovine Serum Albumin                                                                      |
| BSR               | Basal Slowing Response                                                                    |
| BSRC              | Biomedical Sciences Research Center                                                       |
| CaMKK2            | Calcium/CalModulin-dependent protein Kinase Kinase 2                                      |
| cAMP              | cyclic Adenosine MonoPhosphate                                                            |
| cRNA              | coplementary RNA                                                                          |
| ctrl              | control                                                                                   |
| DCVs              | Dense Core Vesicles                                                                       |
| DEG               | DEGenerin                                                                                 |
| DEL               | DEgenerin Like                                                                            |
| Dil               | Diocadecyl tetramethylIndodicarbocyanine-disulphonic acid, lipophilic carbocyanine tracer |
| ds RNA            | double stranded RNA                                                                       |
| DsRED             | Red fluorescent protein from Discosoma                                                    |
| EGFP              | enhanced GFP                                                                              |
| ENaC              | Epithelial sodium (Na <sup>+</sup> ) Channel                                              |
| ER                | Endoplasmic Reticulum                                                                     |
| ERC               | European Research Council                                                                 |
| E <sub>rev</sub>  | average reversal potential                                                                |
| ERS               | ER Stress                                                                                 |
| ER <sup>UPR</sup> | ER Unfolded Protein Response                                                              |
| ESF               | European Social Fund                                                                      |
| FOXO              | FOrkhead boX O4                                                                           |
| GABA              | Gamma-AminoButyric Acid                                                                   |
| GCaMP2.0          | Genetically encoded CalciuM indicator 2.0                                                 |

|            |                                                                                                    |
|------------|----------------------------------------------------------------------------------------------------|
| GFP        | Green Fluorescent Protein                                                                          |
| HB101      | <i>Eserichia coli</i> bacterial strain                                                             |
| HEPES      | (4-(2-HydroxyEthyl)-1-PiperazineEthanesulfonic acid), a zwitterionic sulfonic acid buffering agent |
| hr/hrs     | hour/hours                                                                                         |
| HS         | Heat Stress                                                                                        |
| HSF1       | Heat Shock transcription Factor 1                                                                  |
| HSPs       | Heat Shock Proteins                                                                                |
| HT115(DE3) | <i>Eserichia coli</i> bacterial strain, commonly used for gene knockdown with RNAi                 |
| I          | current                                                                                            |
| IC50       | half-maximal inhibitory concentration                                                              |
| Imax       | maximal current                                                                                    |
| IQD        | interquartile range                                                                                |
| IV         | Current-voltage relationships                                                                      |
| kb         | kilobase                                                                                           |
| KCNQ       | voltage-gated potassium channel                                                                    |
| KRT        | Key Resources Table                                                                                |
| L4 stage   | Larval stage 4                                                                                     |
| LTSt       | Long-Term Starvation                                                                               |
| M13        | isotonic buffer solution for <i>C. elegans</i>                                                     |
| M9         | isotonic buffer solution for <i>C. elegans</i>                                                     |
| mCherry    | a member of the mFruits family of monomeric red fluorescent proteins                               |
| MES        | 2-(N-Morpholino)EthaneSulfonic acid                                                                |
| mg         | milligram                                                                                          |
| ml         | millilitre                                                                                         |
| mM         | millimolar                                                                                         |
| mRNA       | messenger RNA                                                                                      |
| mV         | milliVolt                                                                                          |
| N2         | <i>C. elegans</i> wild type isolate, Bristol variation                                             |
| NCBI       | National Center for Biotechnology Information                                                      |
| NCRR       | National Center for Research Resources                                                             |
| ND96       | physiological NaCl solution                                                                        |
| NEB        | New England Biolabs                                                                                |
| ng         | nanogram                                                                                           |
| NGM        | nematode growth medium                                                                             |
| NIH        | National Institutes of Health                                                                      |
| NLS        | Nuclear Localization Signal                                                                        |
| NMJ        | Neuromuscular Junction                                                                             |
| NRF2       | Nuclear Factor erythroid 2 - related factor 2                                                      |
| NSRF       | National Strategic Reference Framework                                                             |
| O/D        | Over Day                                                                                           |
| O/N        | Over Night                                                                                         |
| OP50       | <i>Eserichia coli</i> bacterial strain, common <i>C. elegans</i> food source in the laboratory     |

|                  |                                                                                                                      |
|------------------|----------------------------------------------------------------------------------------------------------------------|
| OS               | Oxidative Stress                                                                                                     |
| PCR              | Polymerase Chain Reaction                                                                                            |
| PD               | Parkinson's Disease                                                                                                  |
| PKC              | Protein Kinase C                                                                                                     |
| pPD95.77         | plasmid vector                                                                                                       |
| pPK719           | plasmid DNA carrying the coding sequence of the unc-119 gene                                                         |
| pRF4             | plasmid DNA carrying the coding sequence of the mutant collagene rol-6(su1006) causing a dominant "roller" phenotype |
| RNAi             | RNA interference or Post-Transcriptional Gene Silencing                                                              |
| ROS              | Reactive Oxygen Speicies                                                                                             |
| sec              | seconds                                                                                                              |
| SEM              | Standard Error of the Mean                                                                                           |
| SEpHluorin       | Super-Ecliptic pHluorin, a pH sensitive GFP variant                                                                  |
| SGK1             | Serum and Glucocorticoid-induced protein Kinase 1                                                                    |
| SLC5A11          | sodium/SoLute Cotransporter-like 5A11                                                                                |
| SVs              | Synaptic Vesicles                                                                                                    |
| TRP              | Transient Receptor Potential                                                                                         |
| TVEC             | Two-Electrode Voltage Clamp                                                                                          |
| UTRs             | UnTranslated regions                                                                                                 |
| w/v              | weight per volume                                                                                                    |
| wt               | wild type                                                                                                            |
| YFP              | Yellow Fluorescent Protein                                                                                           |
| $\Delta$         | difference                                                                                                           |
| $\Delta E_{rev}$ | reversal potential shift                                                                                             |
| $\mu\text{g}$    | microgram                                                                                                            |
| $\mu\text{l}$    | microlitre                                                                                                           |
| $\mu\text{m}$    | micrometre                                                                                                           |
| $\mu\text{M}$    | microMolar                                                                                                           |



**Table S2.** List of *C. elegans* neurons referred in the paper, Related to Figure 1.

| Neuron Name | Description                                           | Neuronal type                                                          | Location                                                | DEls expression           |
|-------------|-------------------------------------------------------|------------------------------------------------------------------------|---------------------------------------------------------|---------------------------|
| ADEL/R      | Anterior DEirids<br>Left/Right                        | mechanosensory,<br>dopaminergic                                        | head                                                    | DEL-3,<br>DEL-4           |
| ADF         | Amphid neurons with<br>Dual ciliated endings          | sensory (gustatory,<br>oxygen-sensory),<br>serotonergic                | head                                                    |                           |
| ASE         | Amphid neurons with<br>Single-ciliated Endings        | gustatory,<br>glutamatergic                                            | head                                                    | DEL-2,<br>DEL-3,<br>DEL-4 |
| ASH         | Amphid neurons with<br>Single-ciliated Endings        | polymodal sensory,<br>glutamatergic                                    | head                                                    | DEL-2,<br>DEL-4           |
| ASI         | Amphid neurons with<br>Single-ciliated Endings        | sensory (gustatory,<br>thermosensory),<br>insulin releasing            | head                                                    | DEL-2<br>DEL-4            |
| CEPDL/R     | Dorsal Left/Right<br>neurons of CEPhalic<br>sensilla  | mechanosensory,<br>dopaminergic                                        | head                                                    | DEL-2,<br>DEL-3,<br>DEL-4 |
| CEPVL/R     | Ventral Left/Right<br>neurons of CEPhalic<br>sensilla | mechanosensory,<br>dopaminergic                                        | head                                                    | DEL-3,<br>DEL-4           |
| DA 1-9      | Ventral cord "dorsal A"<br>motor neurons              | motor, cholinergic                                                     | body<br>(ventral<br>nerve<br>cord)                      | DEL-4                     |
| DB 1-7      | Ventral cord "dorsal B "<br>motor neurons             | motor/proprioceptiv<br>e, cholinergic                                  | body<br>(ventral<br>nerve<br>cord)                      | DEL-4                     |
| NSML/R      | NeuroSecretory Motor<br>neurons Left/Right            | motor, sensory<br>(proprioceptive/mec<br>hanosensory),<br>serotonergic | pharynx<br>(anterior<br>bulb)                           | DEL-3,<br>DEL-4           |
| PDE         | Posterior DEirid neurons                              | sensory,<br>dopaminergic                                               | posterior<br>half of the<br>body                        | DEL-3,<br>DEL-4           |
| PHA         | PHAsmid neurons                                       | chemosensory,<br>glutamatergic                                         | tail, right<br>and left<br>lumbar<br>ganglia            | DEL-2,<br>DEL-3,<br>DEL-4 |
| PHB         | PHAsmid neurons                                       | chemosensory,<br>glutamatergic                                         | tail, right<br>and left<br>lumbar<br>ganglia            | DEL-2,<br>DEL-3           |
| PHC         | PHAsmid neurons                                       | thermosensory,<br>glutamatergic                                        | tail, right<br>and left<br>lumbar<br>ganglia            | DEL-2,<br>DEL-3           |
| PVM         | Posterior Ventral<br>Microtubule neuronal<br>cell     | mechanosensory                                                         | left side to<br>the<br>posterior<br>half of the<br>body | DEL-4                     |
| URX         | head neurons with<br>nonciliated dendritic<br>endings | oxygen and minor<br>CO <sub>2</sub> sensory,<br>cholinergic            | head                                                    |                           |

|         |                                                                                                                                 |                       |                                         |       |
|---------|---------------------------------------------------------------------------------------------------------------------------------|-----------------------|-----------------------------------------|-------|
| VA 1-12 | Ventral Cord motor neurons                                                                                                      | motor, cholinergic    | body (ventral nerve cord)               | DEL-4 |
| VB 1-11 | Ventral Cord motor neurons                                                                                                      | motor, proprioceptive | body (ventral nerve cord)               | DEL-4 |
| amphid  | sensory organ consisting of 12 sensory neurons (ADF, ADL, AFD, ASE, ASG, ASH, ASI, ASJ, ASK, AWA, AWB, AWC) and one socket cell | sensory               | head (posterior to the nerve ring)      |       |
| phasmid | sensory organ consisting of 3 sensory neurons (PHA, PHB, PQR), one sheath and two socket cells                                  | sensory               | tail (lateral sides, behind the rectum) |       |
| deirid  | a pair of sensory papillae                                                                                                      |                       | lateral cervical region                 |       |

\*Information retrieved from WORMATLAS

(<https://www.wormatlas.org/neurons/Individual%20Neurons/Neuronframeset.html>)

**Table S3.** List of genetic neuronal markers used in the paper, Related to Figure 1.

| Neuronal Marker             | Expression pattern         | Type of Neurons        |
|-----------------------------|----------------------------|------------------------|
| OSM-10::GFP                 | ASH, ASI, PHA, PHB         | sensory, glutamatergic |
| $p_{flp-8}$ GFP             | ASE, URX, PVM, AUA, AVM    | sensory                |
| $p_{dat-1}$ GFP             | CEP, ADE, PDE              | dopaminergic           |
| TPH-1::GFP                  | NSM, ADF, HSN, AFD         | serotonergic           |
| $p_{acr-2}$ GFP             | VA/B, DA/B                 | motor, cholinergic     |
| $p_{unc-47}$ GFP            | RME, AVL, RIS, DVB, VD, DD | motor, GABAergic       |
| $p_{unc-129}$ NLP-21::Venus | DA/B, MC                   | motor, cholinergic     |

\*Information retrieved from WORMBASE (<https://wormbase.org/>)

**Table S4.** List of *C. elegans* genes referred in the paper and their mammalian orthologs, Related to Star methods.

| <b><i>C. elegans</i> Gene</b> | <b>Definition of Nematode Gene</b>           | <b>Human Ortholog</b> | <b>Definition of Human Ortholog</b>                                                           |
|-------------------------------|----------------------------------------------|-----------------------|-----------------------------------------------------------------------------------------------|
| <i>aak-2</i>                  | AMP-Activated Kinase                         | PRKAA1 and 2          | PRotein Kinase AMP-activated catalytic subunit Alpha 1 and 2                                  |
| <i>acd-1</i>                  | ACid-sensitive Degenerin                     | ASIC4                 | Acid Sensing Ion Channel subunit family member 4                                              |
| <i>acr-2</i>                  | AcetylCholine Receptor                       | CHRNA3 and 6          | CHolinergic Receptor Nicotinic Alpha 3 subunit and alpha 6 subunit                            |
| <i>age-1</i>                  | AGEing alteration                            | PIK3CB, D and G       | Phosphatidylinositol-4,5-bisphosphate 3-Kinase Catalytic subunit Beta, Delta and Gamma        |
| <i>asic-1</i>                 | Acid-Sensing/Amiloride-Sensitive Ion Channel | SCNN1B, D and G       | sodium channel epithelial 1 subunit beta, delta and gamma                                     |
| <i>cat-2</i>                  | abnormal CATecholamine distribution          | TH                    | Tyrosine Hydroxylase                                                                          |
| <i>che-2</i>                  | abnormal CHEmotaxis                          | IFT80                 | IntraFlagellar Transport 80                                                                   |
| <i>daf-16</i>                 | abnormal DAuer Formation                     | FOXO4                 | FOrkhead boX O4                                                                               |
| <i>daf-2</i>                  | abnormal DAuer Formation                     | IGF1R, INSR and INSRR | insulin-like growth factor 1 receptor, insulin receptor and insulin receptor related receptor |
| <i>dat-1</i>                  | DopAmine Transporter                         | SLC6A2 and 3          | solute carrier family 6 member 2 and 3                                                        |
| <i>del-2</i>                  | DEgenerin Like                               |                       |                                                                                               |
| <i>del-3</i>                  | DEgenerin Like                               |                       |                                                                                               |
| <i>del-4</i>                  | DEgenerin Like                               | SCNN1G                | sodium channel epithelial 1 subunit gamma                                                     |
| <i>dop-1</i>                  | DOPamine receptor                            | DRD1                  | dopamine receptor D1                                                                          |
| <i>dop-2</i>                  | DOPamine receptor                            | DRD3                  | dopamine receptor D3                                                                          |
| <i>dop-3</i>                  | DOPamine receptor                            | DRD3                  | dopamine receptor D3                                                                          |
| <i>flp-8</i>                  | FMRF-Like Peptide                            |                       |                                                                                               |
| <i>goa-1</i>                  | G protein,O, Alpha subunit                   | GNAO1                 | G protein subunit alpha o1                                                                    |
| <i>gst-4</i>                  | Glutathione S-Transferase                    |                       |                                                                                               |
| <i>hsf-1</i>                  | Heat Shock Factor                            | HSF1 and 2            | heat shock transcription factor 1 and 2                                                       |
| <i>hsp-16.2</i>               | Heat Shock Protein                           |                       |                                                                                               |
| <i>hsp-4</i>                  | Heat Shock Protein                           | HSPA5                 | heat shock protein family A (Hsp70) member 5                                                  |
| <i>kin-1</i>                  | protein KINase                               | PRKACA                | protein kinase cAMP-activated catalytic subunit alpha                                         |
| <i>kin-2</i>                  | protein KINase                               | PRKAR1B               | protein kinase cAMP-dependent type I regulatory subunit beta                                  |
| <i>let-858</i>                | LEThal                                       | CWC22                 | spliceosome associated protein homolog                                                        |
| <i>lin-15</i>                 | abnormal cell LINEage                        |                       |                                                                                               |
| <i>myo-2</i>                  | MYOsine heavy chain structural genes         | MYH1, 2 and 3         | myosin heavy chain 1, 2 and 3                                                                 |
| <i>myo-3</i>                  | MYOsine heavy chain structural genes         | MYH1, 2 and 3         | myosin heavy chain 1                                                                          |
| <i>nlp-21</i>                 | Neuropeptide-Like Protein                    |                       |                                                                                               |

|                |                                                     |                      |                                                                         |
|----------------|-----------------------------------------------------|----------------------|-------------------------------------------------------------------------|
| <i>osm-10</i>  | OSMotic avoidance abnormal                          |                      |                                                                         |
| <i>pkc-1</i>   | Protein Kinase C                                    | PRKCE                | protein kinase C epsilon                                                |
| <i>pkc-2</i>   | Protein Kinase C                                    | PRKCA                | protein kinase C alpha and beta                                         |
| <i>pmp-3</i>   | Peroxisomal Membrane Protein related                | ABCD4                | ATP binding cassette subfamily D member 4                               |
| <i>rab-3</i>   | RAB family                                          | RAB3A                | member RAS oncogene family                                              |
| <i>rol-6</i>   | ROLLER: helically twisted, animals roll when moving | COLQ                 | collagen like tail subunit of asymmetric acetylcholinesterase           |
| <i>skn-1</i>   | SKINhead                                            | NFE2, NFE2L1, NFE2L2 | Erythroid Nuclear Factor 2, NFE2 like bZIP transcription factor 1 and 2 |
| <i>snb-1</i>   | SyNaptoBrevin related                               | VAMP2                | vesicle associated membrane protein 2                                   |
| <i>snt-1</i>   | SyNapTotagmin                                       | SYT1                 | synaptotagmin 1                                                         |
| <i>sod-3</i>   | SuperOxide Dismutase                                | SOD2                 | superoxide dismutase 2                                                  |
| <i>tpa-1</i>   | tetradecanoyl phorbol acetate resistant             | PRKCD and PRKCQ      | protein kinase C delta and protein kinase C theta                       |
| <i>tph-1</i>   | Tryptophan Hydroxylase                              | TPH1 and 2           | tryptophan hydroxylase 1 and 2                                          |
| <i>xbp-1</i>   | X-box Binding Protein                               | XBP1                 | X-box binding protein 1                                                 |
| <i>unc-119</i> | UNCoordinated                                       | UNC-119              | lipid binding chaperone                                                 |
| <i>unc-129</i> | UNCoordinated                                       | GDF10                | growth differentiation factor 10                                        |
| <i>unc-43</i>  | UNCoordinated                                       | CAMK2D               | (calcium/calmodulin dependent protein kinase II delta                   |
| <i>unc-47</i>  | UNCoordinated                                       | SLC32A1              | solute carrier family 32 member 1                                       |
| <i>unc-49</i>  | UNCoordinated                                       |                      |                                                                         |
| <i>unc-54</i>  | UNCoordinated                                       | MYH1, 2 and 3        | myosin heavy chain 1, 2 and 3                                           |

\*Information retrieved from WORMBASE (<https://wormbase.org/>)
